# Supplementary material
Source: HighWire-hosted journal article supplement (https://ajnr-sso.highwirestaging.com/highwire/filestream/69756/field_highwire_adjunct_files/0/19-00240.pdf)
Supplement: 19-00240.pdf [file 19-00240.pdf]

**On-line Table 1: Patient, aneurysm, and device information**

| Information                |          |
|----------------------------|----------|
| Patients                   |          |
| Sex                        |          |
| Female                     | 29 (88%) |
| Male                       | 4 (12%)  |
| Total                      | 33       |
| Age                        |          |
| Mean                       | 63.6     |
| SD                         | 7.8      |
| Aneurysms                  |          |
| Location                   |          |
| MCA                        | 24       |
| AcomA                      | 9        |
| BA-tip                     | 2        |
| ICA bifurcation (terminus) | 1        |
| Total                      | 36       |
| Devices                    |          |
| Type                       |          |
| WEB DL                     | 30       |
| WEB SL                     | 6        |
| Total                      | 36       |

**Note:**—AcomA indicates anterior communicating artery; BA-tip, tip of the basilar artery.

**On-line Table 2: Geometric and hemodynamic variables**

| Variable     | Units | Description                       | Measures                 |
|--------------|-------|-----------------------------------|--------------------------|
| Geometry     |       |                                   |                          |
| Asize        | cm    | Aneurysm size (max diameter)      | Aneurysm size            |
| Nsize        | cm    | Neck size (max diameter)          | Orifice size             |
| AR           | 1     | Aspect ratio (aneurysm/neck size) | Aneurysm elongation      |
| BF           | 1     | Bottleneck factor                 | Aneurysm shape           |
| VOR          | cm    | Volume-to-ostium ratio            | Aneurysm shape           |
| UI           | 1     | Undulation index                  | Shape irregularity       |
| NSI          | 1     | Nonsphericity index               | Shape irregularity       |
| Hemodynamics |       |                                   |                          |
| ICI          | 1     | Inflow concentration index        | Inflow jet concentration |
| Q            | mL/s  | Mean aneurysm inflow              | Aneurysm inflow rate     |
| VE           | cm/s  | Mean velocity                     | Aneurysm blood speed     |
| VO           | 1/s   | Mean vorticity                    | Blood rotational speed   |
| Corelen      | cm    | Vortex corelen length             | Aneurysm flow complexity |

**Note:**—Max indicates maximum.

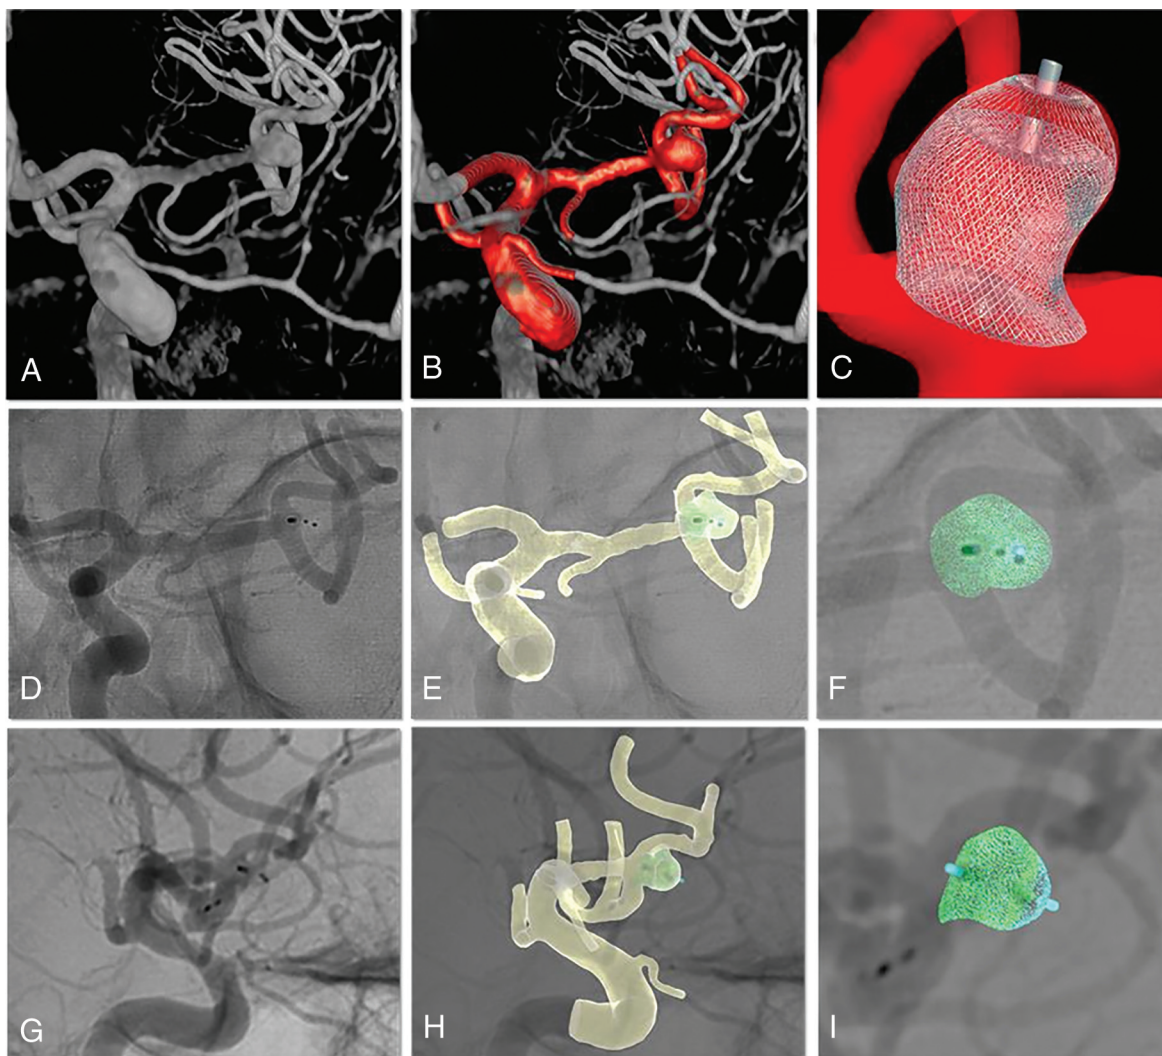

**ON-LINE FIG 1.** Image-based modeling approach. *A*, 3D rotational angiography image. *B*, Vascular model reconstructed from a 3D rotational angiography image. *C*, Vascular model with a virtually implanted intrasaccular device. *D* and *G*, 2D angiography images post-device deployment from 2 different views. *E* and *H*, Semitransparent 3D model superposed on 2D angiography images from 2 different views. *F* and *I*, Device models superposed on 2D angiography images matching device markers in 2 different views.

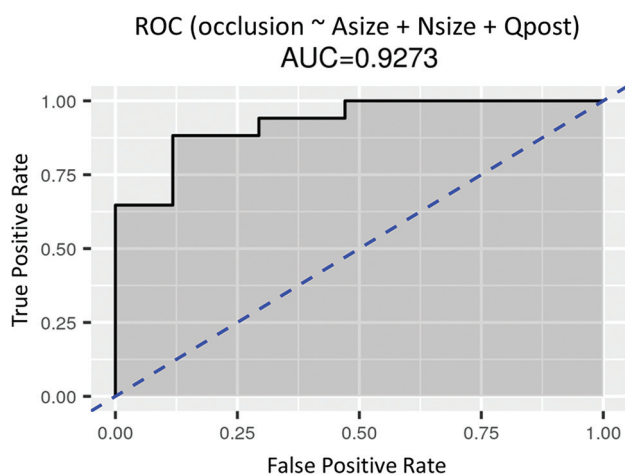

**ON-LINE FIG 2.** Receiver operating characteristic (ROC) curve for a multivariate model of incomplete occlusion based on Asize, Nsize, and Qpost.
